1 **Refutation: Structure and mechanism of the essential two-component signal-transduction**  
2 **system WalkR in *Staphylococcus aureus*.**

3

4 Ian R. Monk<sup>1</sup>, Torsten Seemann<sup>2</sup>, Benjamin P. Howden<sup>1,3</sup>, and Timothy P. Stinear<sup>1</sup>

5

6 <sup>1</sup>Department of Microbiology and Immunology, Peter Doherty Institute for Infection and Immunity, University of  
7 Melbourne, Melbourne, Victoria, Australia

8 <sup>2</sup>Victorian Life Sciences Computational Initiative, University of Melbourne, Carlton, Victoria, Australia

9

10 In a recent report in *Nature Communications*, Ji *et al.*, (2016) <sup>1</sup> describe the structure of the  
11 extracytoplasmic Per-Arnt-Sim (PAS) domain of Walk (Walk<sup>EC-PAS</sup>), the sensor kinase of the  
12 essential two-component regulator WalkR in *Staphylococcus aureus* <sup>1</sup>. The authors make two  
13 independent *walk* *S. aureus* mutants by changing two amino acid residues they postulate from  
14 structural analysis and comparisons might be important for signal transduction. We have also  
15 been exploring the function of WalkR and were surprised by the striking phenotypic impact of  
16 these single amino acid substitutions in the Walk sensor, which are contrary to our own  
17 (unpublished) observations.

18

19 Ji *et al.*, subjected their Walk<sup>EC-PAS</sup> mutants (D119A and V149A) to a series of phenotypic screens to  
20 probe the function of this domain. Compared to the methicillin sensitive *S. aureus* Newman wild  
21 type, the mutants showed dramatic phenotype changes that included altered growth kinetics,  
22 reduced susceptibility to lysostaphin exposure, loss of haemolysis on sheep blood agar, reduced  
23 biofilm formation and reduced virulence in a mouse infection model. RNAseq comparisons of  
24 mutants and wild type showed substantial transcriptional changes, with 313 differentially  
25 expressed genes between the two Walk<sup>EC-PAS</sup> mutants and wild type. The authors also used  
26 structure-based virtual screening to identify 2, 4-dihydroxybenzophenone (DHBP) as a small  
27 molecule predicted to interact with the Walk<sup>EC-PAS</sup> domain. Under the assumption that DHBP is an  
28 activator of WalkR (no direct evidence for this was presented), they then compared transcriptional  
29 responses of *S. aureus* wild type against DHBP exposure and with their D119A mutant. The authors  
30 reported that there were 41 genes that were down-regulated in the D119A mutant and up-  
31 regulated in DHBP-treated cells, and concluded that this supported a role for DHBP in activating  
32 WalkR. No biochemical evidence to support activation of WalkR phosphotransfer activity was  
33 presented.

34

35 To investigate further, we were provided with *S. aureus* Newman wild type, D119A and V149A by  
36 the senior author, Chuan He, University of Chicago (UoC) <sup>1</sup>. We first recreated the D119A  
37 mutation in two *S. aureus* backgrounds. We mutated methicillin sensitive *S. aureus* Newman wild  
38 type and methicillin resistant *S. aureus* NRS384 (USA300) using allelic exchange <sup>2</sup>, and confirmed  
39 by whole genome sequencing, read-mapping and difference identification <sup>3</sup>, that we had only  
40 introduced the A->C single nucleotide substitution in *Walk*<sup>EC-PAS</sup> (accession: PRJEB14381). We then  
41 tested these mutants for some of the key phenotype changes observed by Ji *et al.*, <sup>1</sup>. We  
42 established that D119A-UoC was non-hemolytic as published but also observed that both our  
43 D119A-UoM mutants (Newman and NRS384) were fully hemolytic (Fig. 1A) and exhibited identical  
44 growth curve kinetics as wild type Newman and NRS384 (Fig. 1B).

45

46 To resolve the discrepancies between our phenotypes and those of the apparently identical  
47 mutants published by Ji *et al.*, <sup>1</sup> we also subjected their three strains (*S. aureus* Newman wild type  
48 UoC, D119A-UoC and V149-UoC) to whole genome sequencing and analysis (accession:  
49 PRJEB14381) <sup>3</sup>. Relative to the *S. aureus* Newman UoC wild type, both mutants D119A and V149A  
50 had acquired at least four extra mutations in addition to their expected *walk*<sup>EC-PAS</sup> changes, most  
51 notably two independent loss-of-function mutations in *saeRS*, a major two-component regulator  
52 that controls expression of many genes involved in virulence and biofilm formation (Table 1) <sup>4,5</sup>.  
53 D119A-UoC had a TT insertion at chromosome position 757521 that introduced a frameshift to  
54 *saeS*. Strain V149A-UoC had a G->T substitution at chromosome position 757893 that introduced a  
55 premature stop codon to *saeR* (Table 1). It is these secondary mutations in *saeRS*, rather than the  
56 targeted mutations in *walk*<sup>EC-PAS</sup>, that likely explain the phenotypes observed by Ji *et al.*, (reduced  
57 biofilm, loss of hemolysis, reduced virulence) <sup>5</sup>. There is precedence for this specific phenomenon.  
58 Sun *et al.*, showed in detail that elevated temperature and antibiotic selection used during the  
59 mutagenesis process can aid in the selection of *saeRS* mutations <sup>5</sup>. How Ji *et al.*, managed to  
60 complement the mutations in D119A-UoC and V149A-UoC by phage integrase plasmid expression  
61 (pCL55) of *walkR* alleles remains to be explained <sup>1</sup>. Unfortunately, we have been unable thus far  
62 to obtain their complemented mutants for further analysis.

63

64 We also observed that D119A-UoC and V149A-UoC exhibited larger colonies compared to wild  
65 type, a phenotypic difference not discussed by Ji *et al.* <sup>1</sup>. This change in both mutants might be

66 explained by the C>T substitution observed at 820318, leading to an A128V change in HprK (Table  
67 1), a serine kinase known to be involved in catabolite repression and associated with a spreading  
68 colony phenotype <sup>6</sup>.

69

70 We next re-examined the authors' RNAseq data (accession No: GSE75731) obtained from  
71 biological duplicate experiments of *S. aureus* Newman wild type, D119A-UoC, V149A-UoC and wild  
72 type with DHBP treatment). Using *Kallisto* <sup>7</sup> and the *S. aureus* Newman reference genome  
73 (NC\_009641) we quantified transcript abundance for each of the four conditions. The output of  
74 *Kallisto* was analysed and visualized using Degust <sup>8</sup>. A dynamic link to this analysis is available <sup>9</sup> and  
75 the raw transcript abundance count data used in Degust is provided (Supplementary Table S1).  
76 Multi-dimensional scaling plots showed good consistency between the biological replicates.  
77 However wild type, DHBP and the two mutants each displayed clustering that suggested very  
78 distinct transcriptional profiles (Fig. 1C). Applying threshold cutoffs of 2-fold change and FDR  
79 <0.01, we then replicated the intersection analysis of Ji *et al.*, but found only nine genes (not the  
80 reported 41) that were down regulated in D119A-UoC and up regulated in DHBP-treated bacteria  
81 (Fig. 1D). Among the nine genes, only five overlapped with the 41 reported by Ji *et al.*, <sup>1</sup> and none  
82 of these included autolysins previously linked to the WalKR regulon (Table 2) <sup>10,11</sup>. In fact, five of  
83 the nine genes listed have all previously been reported to be under SaeRS control (Table 2) <sup>4</sup>.  
84 Given that D119A-UoC is a SaeS null mutant, these data suggest DHBP is as likely to be interacting  
85 with SaeS as it is with WalK.

86

87 We also noted that only 52 genes were differentially expressed upon exposure to DHBP, in  
88 comparison to the claimed 145 genes <sup>1</sup>. We think this discrepancy and the preceding difference  
89 were due to the absence of any filter for false discovery rate (FDR) applied by Ji *et al.*, <sup>1</sup>. For  
90 example, our analysis of their RNA-seq data without a FDR threshold resulted in 172 differentially  
91 expressed genes in DHBP-treated cells compared to WT) <sup>9</sup>. RNAseq expression data without  
92 threshold significance cutoffs are not meaningful <sup>12</sup>.

93

94 We also mapped the authors' RNAseq reads for D119A-UoC and V149A-UoC (accession No:  
95 GSE75731) to the *S. aureus* Newman reference (NC\_009641) <sup>3</sup> and readily detected the same  
96 *saeRS* mutations we observed from our independent sequencing of these mutants.

97

98 **Conclusion:** Our analyses highlight two major issues with the study of Ji *et al.*<sup>1</sup> Firstly, the presence  
99 of unintended *saeRS* mutations in their *walk*<sup>EC-PAS</sup> mutants limit meaningful interpretation of their  
100 data and invalidate their conclusions with respect to role of the Walk extracytoplasmic domain in  
101 controlling WalkR function. Secondly, the RNAseq data appears to have been inadequately  
102 analysed, with no filtering for false discovery. Application of an appropriate threshold ( $p < 0.01$ ) to  
103 their data substantially changes the lists of differentially expressed genes. The authors' use the  
104 overlap between the D119A mutant and DHBP treatment to claim that DHBP is signaling through  
105 Walk<sup>EC-PAS</sup> when they state: "Together, the transcriptome profiling supports the role of DHBP in  
106 activating WalkR TCS". However, this conclusion is not supported by the data at all. In fact, a more  
107 plausible conclusion is that DHBP is interacting with SaeRS (Table 2).

108

109 The discovery of small molecule inhibitors of WalkR function would represent a major advance in  
110 the fight against multidrug resistant *S. aureus*, and Ji *et al.*, have shown a promising approach  
111 through structural and functional analyses<sup>1</sup>. Unfortunately, based on the data presented, the  
112 authors' principal conclusions are not supported. This study is another example of the pitfalls  
113 associated with allelic exchange in *S. aureus* and the rigor that must be applied to mutation validation  
114<sup>5</sup>. Whole genome sequencing is now so affordable that it should be used routinely to verify  
115 targeted mutants and the complemented strains. In our own WalkR research we have observed a  
116 propensity for mutations introduced into this locus to yield secondary compensatory events<sup>11,13</sup>.  
117 These secondary changes can confound analysis of this essential two-component system, and  
118 highlight the extreme care needed when manipulating the *walkR* locus and then attributing  
119 specific phenotypes to particular mutational changes.

120

## 121 **References:**

- 122 1 Ji, Q. *et al.* Structure and mechanism of the essential two-component signal-transduction  
123 system WalkR in *Staphylococcus aureus*. *Nat Commun* **7**, 11000,  
124 doi:10.1038/ncomms11000 (2016).
- 125 2 Monk, I. R., Tree, J. J., Howden, B. P., Stinear, T. P. & Foster, T. J. Complete Bypass of  
126 Restriction Systems for Major *Staphylococcus aureus* Lineages. *mBio* **6**, e00308-00315,  
127 doi:10.1128/mBio.00308-15 (2015).
- 128 3 Seemann, T. *Rapid bacterial SNP calling and core genome alignments*,  
129 <<https://github.com/tseemann/snippy>> (2015).
- 130 4 Liang, X. *et al.* Inactivation of a two-component signal transduction system, SaeRS,  
131 eliminates adherence and attenuates virulence of *Staphylococcus aureus*. *Infect Immun* **74**,  
132 4655-4665, doi:10.1128/IAI.00322-06 (2006).

- 133 5 Sun, F. *et al.* Aureusimines in *Staphylococcus aureus* are not involved in virulence. *PLoS One*  
134 **5**, e15703, doi:10.1371/journal.pone.0015703 (2010).
- 135 6 Ueda, T., Kaito, C., Omae, Y. & Sekimizu, K. Sugar-responsive gene expression and the agr  
136 system are required for colony spreading in *Staphylococcus aureus*. *Microb Pathog* **51**, 178-  
137 185, doi:10.1016/j.micpath.2011.04.003 (2011).
- 138 7 Bray, N. L., Pimentel, H., Melsted, P. & Pachter, L. Near-optimal probabilistic RNA-seq  
139 quantification. *Nature biotechnology* **34**, 525-527, doi:10.1038/nbt.3519 (2016).
- 140 8 Powell, D. R. *Degust*, <<https://github.com/Victorian-Bioinformatics-Consortium/degust>>  
141 (2013).
- 142 9 Monk, I. R., Seemann, T. & Stinear, T. P. *Degust: RNAseq analysis*,  
143 <[http://www.vicbioinformatics.com/degust/compare.html?code=d2ac966d9f90624bd366](http://www.vicbioinformatics.com/degust/compare.html?code=d2ac966d9f90624bd3663687475d71c2)  
144 [3687475d71c2](http://www.vicbioinformatics.com/degust/compare.html?code=d2ac966d9f90624bd3663687475d71c2)> (2016).
- 145 10 Dubrac, S. & Msadek, T. Identification of genes controlled by the essential YycG/YycF two-  
146 component system of *Staphylococcus aureus*. *J Bacteriol* **186**, 1175-1181 (2004).
- 147 11 Howden, B. P. *et al.* Evolution of multidrug resistance during *Staphylococcus aureus*  
148 infection involves mutation of the essential two component regulator WalkR. *PLoS Pathog*  
149 **7**, e1002359, doi:10.1371/journal.ppat.1002359 (2011).
- 150 12 Conesa, A. *et al.* A survey of best practices for RNA-seq data analysis. *Genome biology* **17**,  
151 13, doi:10.1186/s13059-016-0881-8 (2016).
- 152 13 McEvoy, C. R. *et al.* Decreased vancomycin susceptibility in *Staphylococcus aureus* caused  
153 by IS256 tempering of WalkR expression. *Antimicrob Agents Chemother* **57**, 3240-3249,  
154 doi:10.1128/AAC.00279-13 (2013).

155  
156  
157

158 **Table 1:** List of mutations identified by WGS in *S. aureus* Newman (University of Chicago)

| Position<br><i>S. aureus</i><br>Newman<br>(NC_009641) | Sa_Newman-WT-UoC<br>(Acc: ERR1450026) | Sa_Newman-D119A-UoC<br>(Acc: ERR1450027) | Sa_Newman-V149A-UoC<br>(Acc: ERR1450028) | Locus_tag (NWMN_) | Gene        | Comment<br>(product, predicted consequence of mutation)            |
|-------------------------------------------------------|---------------------------------------|------------------------------------------|------------------------------------------|-------------------|-------------|--------------------------------------------------------------------|
| 26001                                                 | A                                     | C                                        | A                                        | 0018              | <i>walk</i> | Sensor kinase: missense_variant c.356A>C<br>p.Asp119Ala            |
| 26091                                                 | T                                     | T                                        | C                                        | 0018              | <i>walk</i> | Sensor kinase: missense_variant c.446T>C<br>p.Val149Ala            |
| 757521                                                | -                                     | TT                                       | -                                        | 0674              | <i>saeS</i> | Sensor kinase: frameshift_variant c.152_153insAA<br>p.Thr52fs      |
| 757893                                                | C                                     | C                                        | A                                        | 0675              | <i>saeR</i> | DNA-binding response regulator:<br>stop_gained c.469G>T p.Glu157*  |
| 820318                                                | C                                     | T                                        | T                                        | 0728              | <i>hprK</i> | HPr kinase/phosphorylase: missense_variant<br>c.383C>T p.Ala128Val |
| 2370634                                               | C                                     | G                                        | C                                        | 2142              | <i>rplN</i> | 50S ribosomal protein L14: missense_variant<br>c.86G>C p.Gly29Ala  |

159

160

161 **Table 2:** List of the nine CDS shown in Fig. 1D that were down regulated in D119A and up-  
162 regulated on exposure to DHBP (both treatments compared to *S. aureus* Newman wild type).

| No. | Product                                       | Locus_tag | Log <sub>2</sub> FC |            |
|-----|-----------------------------------------------|-----------|---------------------|------------|
|     |                                               |           | WT vs D119A         | WT vs DHBP |
| 1   | Staphylocoagulase precursor ( <i>coa</i> )    | 0166      | -2.92               | 2.40*      |
| 2   | Superantigen-like protein 7 ( <i>ss7</i> )    | 0394      | -1.64               | 2.46*      |
| 3   | Hypothetical protein                          | 0401      | -1.94               | 2.56       |
| 4   | Sodium-dependent symporter protein            | 0423      | -1.18               | 1.47       |
| 5   | Secreted VWF-binding protein precursor        | 0757      | -1.88               | 2.40*      |
| 6   | Cytochrome D ubiquinol oxidase, subunit I     | 0952      | -2.05               | 1.32       |
| 7   | Cytochrome D ubiquinol oxidase, subunit II    | 0953      | -1.88               | 1.39       |
| 8   | Fibronectin binding protein B ( <i>fnbB</i> ) | 2397      | -4.02               | 1.53*      |
| 9   | Immunodominant antigen A                      | 2469      | -1.25               | 1.45*      |

163

164 Notes: #FDR <0.01; §Numbers in red indicate previously reported as SaeRS regulated<sup>4</sup>, \*Asterisk indicates also  
165 reported as upregulated by Ji *et al.*<sup>1</sup>.

166

167

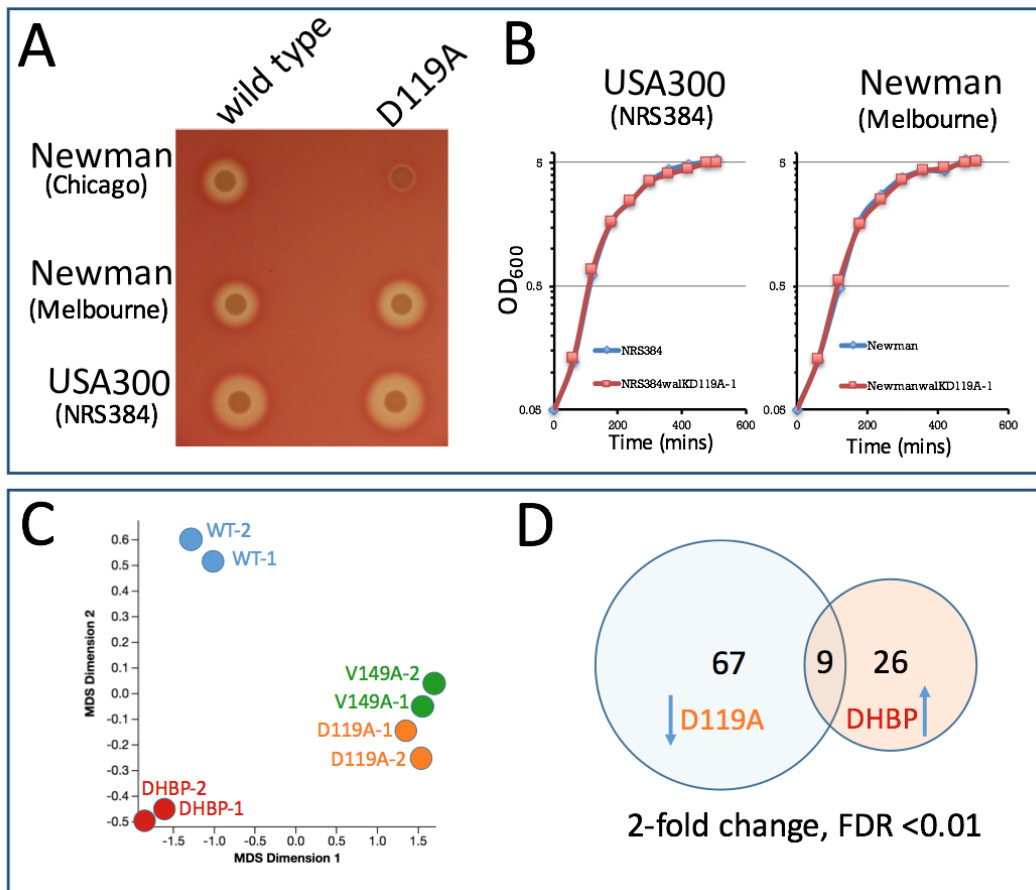

168 Fig. 1

169

170 **Fig. 1: Comparisons of *S. aureus walk*<sup>EC-PAS</sup> mutants.** (A) Hemolysis pattern of D119A mutants on  
171 sheep blood agar versus wild type for *S. aureus* Newman (University of Chicago), *S. aureus*  
172 Newman (University of Melbourne) and *S. aureus* NRS384 (USA300). (B) Growth curve analysis of  
173 *S. aureus* Newman (University of Melbourne) and *S. aureus* USA300 NRS384 D119A mutants,  
174 showing no difference to wild type. (C) Multidimensional scaling plot based on re-analysis of  
175 published RNAseq data from Ji *et al.*,<sup>1</sup> showing similar transcriptional profiles for the *walk*<sup>EC-PAS</sup>  
176 mutants but distinct from wild type treated with 2, 4-dihydroxybenzophenone (DHBP) (2-fold  
177 change, FDR < 0.01). (D) Venn diagram based on published RNAseq data from Ji *et al.*,<sup>1</sup> showing  
178 nine CDS that are down regulated in the D119A mutant and upregulated on exposure to DHBP.

179

180
